# Supplementary material for: Large-scale synthesis of self-assembled ultralong cannonite nanobelt film as a visible-light photocatalyst
Source: Royal Society of Chemistry journal article supplement (doi:10.1039/c4ra10916c), 2014-12-23
Supplement: c4ra10916c1.pdf [file c4ra10916c1.pdf]

**Supporting Information**

**Large-scale Synthesis of Self-assembled Ultralong Cannonite Nanobelt Film as  
Visible-light Photocatalyst**

*Junjun Zhang, Heyun Gu, Xiaoning Yang, Min Chen, Zeheng Yang, Weixin Zhang\**

School of Chemistry and Chemical Engineering, Anhui Key Laboratory of  
Controllable Chemical Reaction and Material Chemical Engineering, Hefei  
University of Technology, Hefei 230009, China

\* Corresponding author. Tel: +86 551 62901450. Fax: +86 551 62901450.

E-mail address: wxzhang@hfut.edu.cn (W. X. Zhang).

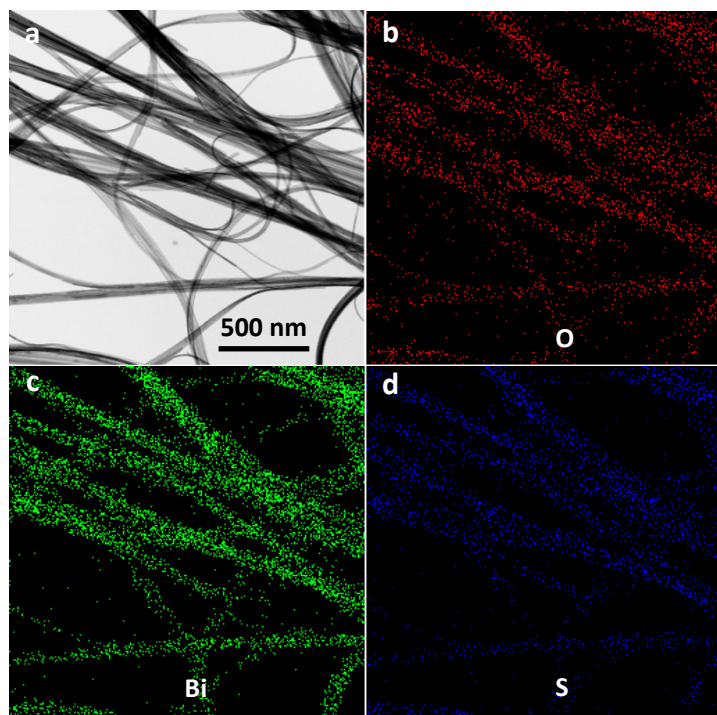

**Fig. S1** STEM-EDS elemental maps of the as-prepared nanobelts: (a) STEM image, (b) O elemental map, (c) Bi elemental map, and (d) S elemental map.

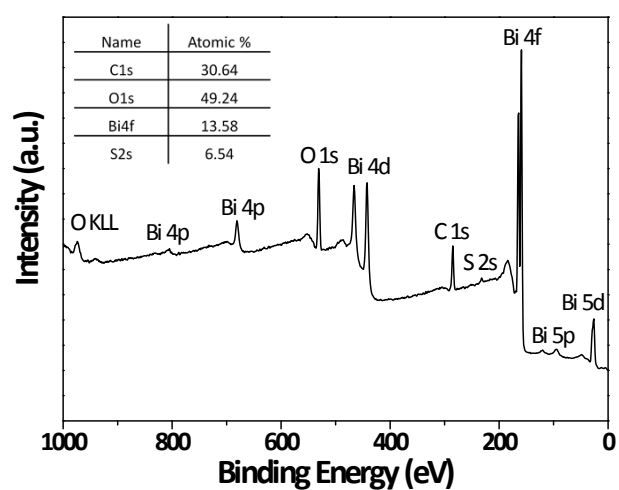

**Fig. S2** The X-ray photoelectron survey spectra collected from the as-prepared nanobelts. Inset is the corresponding table showing its elemental atomic ratio.

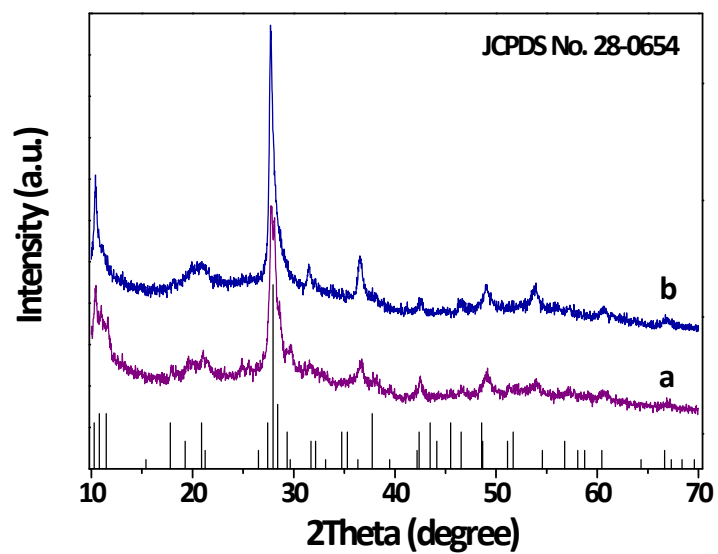

**Fig. S3** XRD patterns of the samples prepared at 0 h (a) and 0.5 h (b) with standard XRD pattern of  $\text{Bi}_6(\text{NO}_3)_4(\text{OH})_2\text{O}_6$ .

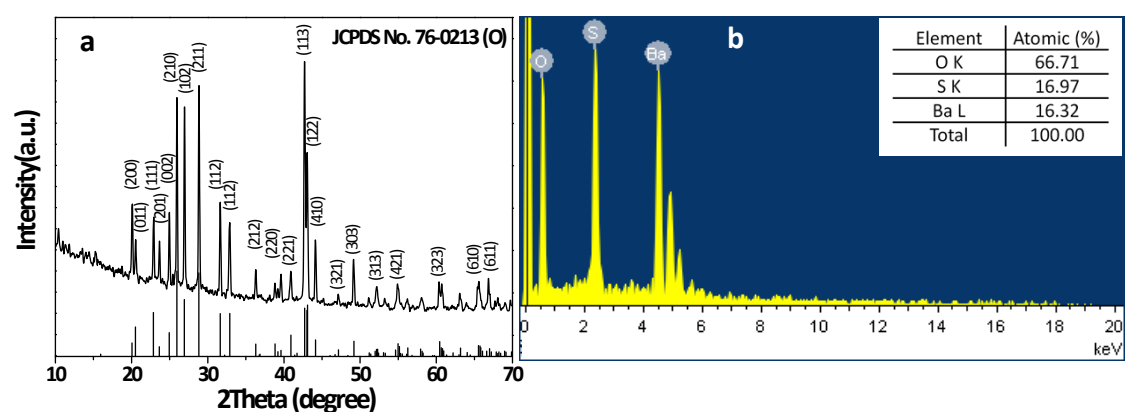

**Fig. S4** (a) XRD pattern of the white precipitate resulted from mixing the reacted solution for Bi<sub>2</sub>O(OH)<sub>2</sub>SO<sub>4</sub> nanobelts with BaCl<sub>2</sub> aqueous solution and standard XRD pattern of BaSO<sub>4</sub>, (b) EDS spectrum of the white precipitate. Inset in (b) is the corresponding table showing its elemental atomic ratio of the white precipitate.

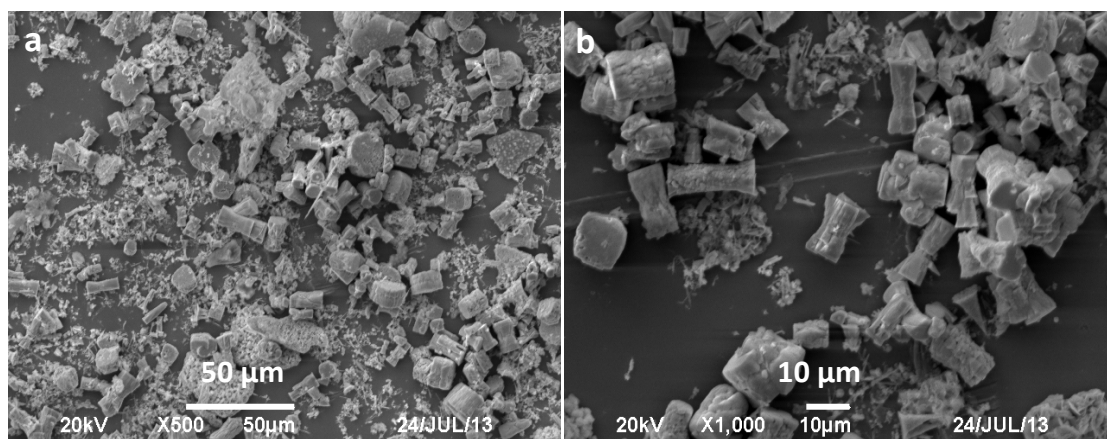

**Fig. S5** SEM images of the as-prepared sample obtained hydrothermally under the same conditions but without SDS.

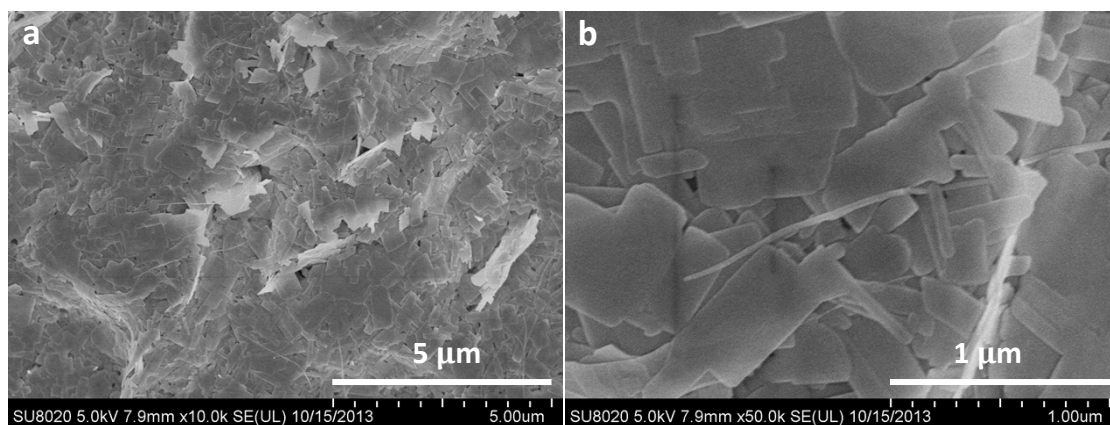

**Fig. S6** FESEM images of the as-prepared sample obtained hydrothermally with  $\text{Na}_2\text{SO}_4$  as reactant instead of SDS.

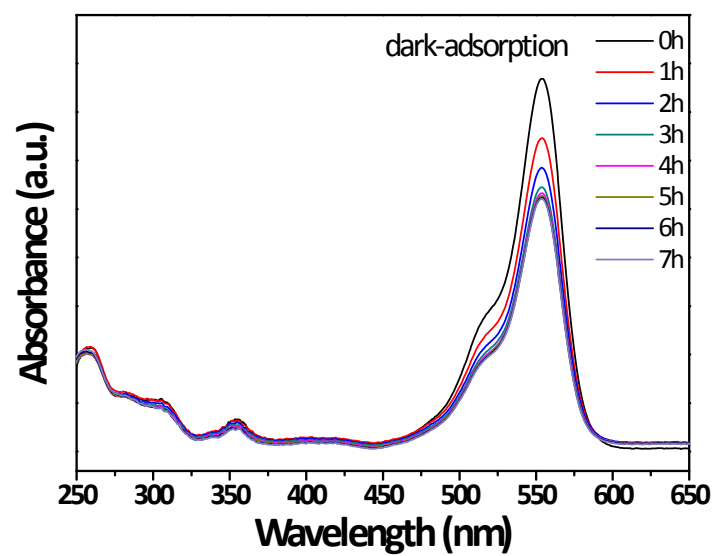

**Fig. S7** Temporal UV-vis spectral evolutions of RhB aqueous solution in the presence of nanobelt film as a function of time under dark condition.

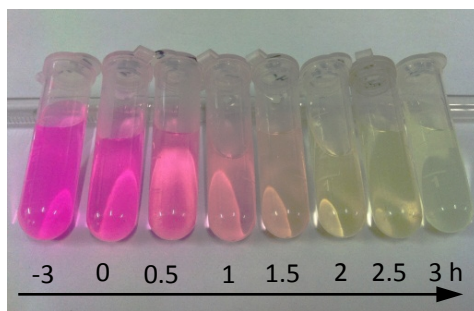

**Fig. S8** The optical image of the color changes for the RhB solution during nanobelt powder photocatalytic process (-3 h represents 3 h of dark adsorption before visible light irradiation).

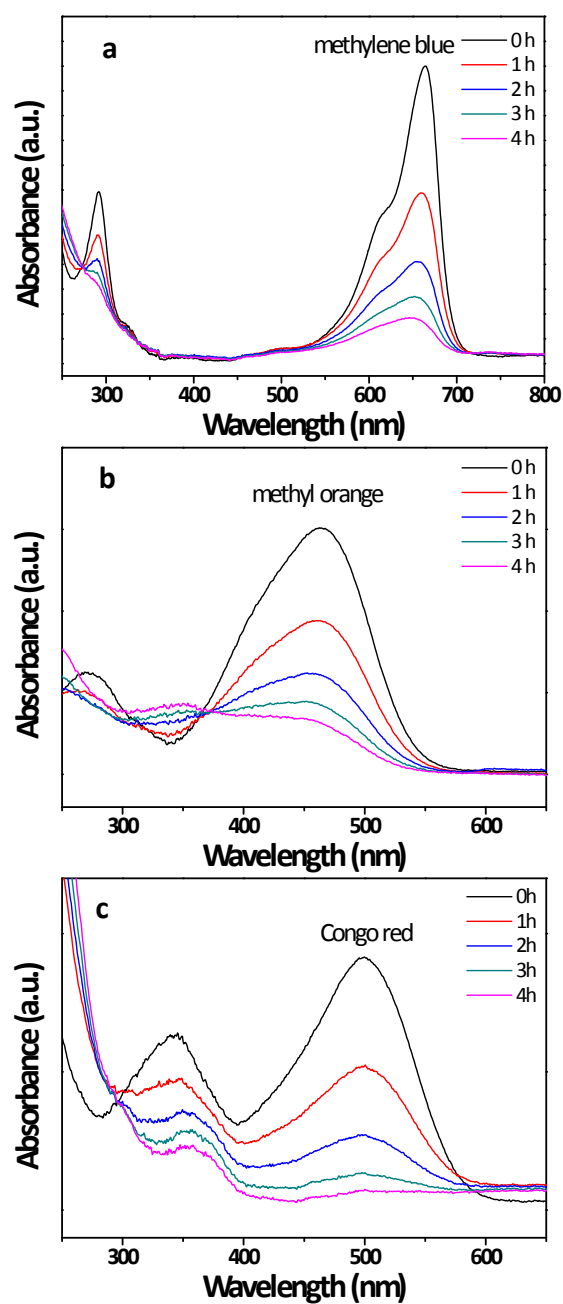

**Fig. S9** Temporal UV-vis spectral evolutions of methylene blue (a), methyl orange (b), and Congo red (c) dye aqueous solution in the presence of nanobelt film as a function of time under visible light irradiation (2.8~3.2 mg transferred film to 3 mL 1 ppm dye aqueous solutions).
